# Supplementary material for: Ocean acidification and nutrient limitation synergistically reduce growth and photosynthetic performances of a green tide alga Ulva linza
Source: Copernicus journal article supplement (doi:10.5194/bg-15-3409-2018), 2018-06-11
Supplement: Supplementary file 1 [file bg-15-3409-2018-supplement.zip]

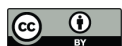

## *Supplement of*

# **Ocean acidification and nutrient limitation synergistically reduce growth and photosynthetic performances of a green tide alga *Ulva linza***

**Guang Gao et al.**

*Correspondence to:* Juntian Xu (jtxu@hhit.edu.cn)

- [bg-15-3409-2018-supplement-title-page.pdf](#)
- [Research data-supplymentary material.xlsx](#)

The copyright of individual parts of the supplement might differ from the CC BY 4.0 License.
