# Supplementary material for: Ocean acidification and nutrient limitation synergistically reduce growth and photosynthetic performances of a green tide alga Ulva linza
Source: Copernicus journal article supplement (doi:10.5194/bg-15-3409-2018), 2018-06-11
Supplement: Supplementary file 1 [file Research data-supplymentary material.xlsx]

## Sheet: Length
Young (μm)
	Average	SD	Average	SD	Average	SD	Average	SD	Average	SD	Average	SD	Average	SD	Average	SD
Culture period	LCLNLP		LCHNLP		LCLNHP		LCHNHP		HCLNLP		HCHNLP		HCLNHP		HCHNHP
1	3.02	0.01	3	0.01	3.02	0.01	3.02333	0.01528	3.02	0.01	3	0.01	3.02	0.01	3.02333	0.01528
2	3.43664	0.10492	3.48243	0.08681	3.34723	0.13359	5.35894	0.18273	3.54667	0.30089	4.31	0.03606	4.36	0.06557	5.98667	0.03512
4	12.5736	1.13973	20.7786	2.9983	89.9938	0.34065	107.296	2.84834	9.44697	0.51134	11.075	0.45224	58.3308	5.30273	72.6583	1.98528
6	36.5957	2.69894	40.9575	2.96433	503.698	1.20954	947.855	7.11896	18.5103	1.64098	30.5095	1.6737	528.898	12.7186	643.75	47.5013
8	63.0944	2.52458	68.6022	2.22208	4775.61	163.219	5113.34	256.144	37.4538	2.412	43.7244	1.86564	3294.34	39.4015	3734.55	230.061
10	73.4367	3.86046	81.9197	6.90094	6613.61	232.182	8484.03	199.179	49.3393	2.17693	51.4323	4.47561	6479.96	362.43	6602.29	61.826
12	116.093	10.2802	149.228	6.72302	23563.6	2408.17	27838.3	2312.7	63.3759	0.96443	75.7997	5.24586	12186	951.669	16482.4	2283.44
14	184.746	14.2374	208.57	25.7695	44400.7	3450.16	81970.6	4493.21	94.3914	0.67684	107.533	13.6314	21494.9	1804.73	40708.5	5034.46
16	249.732	16.5261	294.982	24.7835	78700.5	5765.57	160290	11211.6	136.603	11.5998	159.385	3.2871	78273.9	6880.03	136469	15720.2
Adult (cm)
	Average	SD	Average	SD	Average	SD	Average	SD	Average	SD	Average	SD	Average	SD	Average	SD
Culture period	LCLNLP		LCHNLP		LCLNHP		LCHNHP		HCLNLP		HCHNLP		HCLNHP		HCHNHP
1	5.11667	0.07638	5.2	0.05	5.11667	0.12583	5.1	0.1	5.25	0.05	5.2	0.13229	5.18333	0.12583	5.2	0.05
3	6.2	0.35	6.3	0.13229	6.46667	0.37859	6.78333	0.16073	6.11667	0.07638	6.18333	0.10408	6.83333	0.24664	6.86667	0.27538
5	7.4	0.50744	7.9	0.56789	8.58333	0.79739	9.26667	0.67885	6.86667	0.07638	7.11667	0.10408	8.91667	1.15578	9.3	0.75498
7	9.85	0.37749	10.8667	1.52753	13.1167	1.35308	14.3167	1.90351	8.56667	0.15275	9.01667	0.22546	12.4667	1.44943	14.3333	2.1097
9	11.4667	1.44597	13.4167	1.10943	16.55	2.27541	20.0167	2.33041	9.91667	0.89489	10.5167	0.37859	16.5167	2.15078	19.7833	1.48436

## Sheet: Growth rate
Young (%d-1)
	Average	SD	Average	SD
Treatment	LC		HC
HNHP	72.5117	0.43429	71.4203	0.75113
LNHP	67.7757	0.47917	67.7342	0.59945
HNLP	30.5729	0.58401	26.4838	0.15957
LNLP	29.4245	0.4275	25.396	0.57926
Adult(%d-1)
	Average	SD	Average	SD
Treatment	LC		HC
HNHP	21.4312	0.83962	21.7277	0.58605
LNHP	18.3386	1.0721	18.6246	1.13281
HNLP	12.6603	0.64576	10.8166	0.56755
LNLP	9.59859	0.47679	7.07591	0.68191

## Sheet: Photosynthesis-respiration
Photosynthesis (µmol O2 g-1 FM h-1)
	Average	SD	Average	SD
Treatment	LC		HC
HNHP	231.583	12.2949	205.012	9.71341
LNHP	113.838	7.98549	92.3822	9.71294
HNLP	87.7335	7.25162	61.4175	8.01262
LNLP	55.7408	1.39321	51.8146	1.14393
Respiration(µmol O2 g-1 FM h-1)
	Average	SD	Average	SD
Treatment	LC		HC
HNHP	29.8739	2.82764	27.6454	1.74386
LNHP	29.3498	2.52038	27.5353	1.69328
HNLP	26.6947	2.01763	26.9802	1.99481
LNLP	27.5396	2.13867	26.0441	1.73723

## Sheet: rETR
rETR (μmol e- m-2 s-1)
	Average	SD	Average	SD
Treatment	LC		HC
HNHP	112	2.29129	111.5	3.03109
LNHP	105.25	1.88746	105.75	2.70416
HNLP	96	1.5	89	3.77492
LNLP	89.75	2.63391	81	1.5

## Sheet: Pigment
Chl a(mg g-1FM)
	Average	SD	Average	SD
Treatment	LC		HC
HNHP	2.1109	0.12994	1.68209	0.08334
LNHP	1.32344	0.13003	0.88509	0.08022
HNLP	0.98396	0.07557	0.65823	0.08813
LNLP	0.75319	0.07467	0.56485	0.02009
Chl b(mg g-1FM)
	Average	SD	Average	SD
Treatment	LC		HC
HNHP	1.36773	0.09263	1.04673	0.06617
LNHP	0.88085	0.12006	0.56432	0.03374
HNLP	0.68043	0.04499	0.47662	0.06
LNLP	0.64453	0.06445	0.49053	0.05675

## Sheet: NRA
NRA (µmol NO2- g-1 FM h-1)
	Average	SD	Average	SD
Treatment	LC		HC
HNHP	9.58814	0.63727	11.8822	0.73681
LNHP	7.58743	0.57692	9.17639	0.40582
HNLP	6.64937	0.29479	7.3969	0.16064
LNLP	6.35226	0.28898	6.45906	0.34128

## Sheet: Soluble protein
Soluble protein (mg g-1FM)
	Average	SD	Average	SD
Treatment	LC		HC
HNHP	10.3205	0.5256	12.5069	0.57151
LNHP	8.38256	0.31562	9.85191	0.59831
HNLP	7.88287	0.25755	7.90137	0.28272
LNLP	7.76583	0.17006	7.70958	0.25339
